# Supplementary material for: A room-temperature self-healing elastomer with ultra-high strength and toughness fabricated via optimized hierarchical hydrogen-bonding interactions
Source: Royal Society of Chemistry journal article supplement (doi:10.1039/d1ta08748g), 2021-12-31
Supplement: d1ta08748g1.pdf [file d1ta08748g1.pdf]

**A room-temperature self-healing elastomer with ultra-high strength  
and toughness fabricated via optimized hierarchical hydrogen-bonding  
interactions**

LiangLiang Xia, HongJun Tu, Wen Zeng, XiaoLing Yang, Ming Zhou\*, Linkai Li, Xiao

Guo

Liang Liang Xia, HongJun Tu, Wen Zeng, XiaoLing Yang  
School of New Energy and Materials, Southwest Petroleum University, Chengdu,  
610500, P. R. China

Ming Zhou, Linkai Li, Xiao Guo  
State Key Laboratory of Oil and Gas Reservoir Geology and Exploitation, School of  
New Energy and Materials, Southwest Petroleum University, Chengdu, 610500, P. R.  
China

\*Corresponding author. E-mail: [mr.zhouming@163.com](mailto:mr.zhouming@163.com)

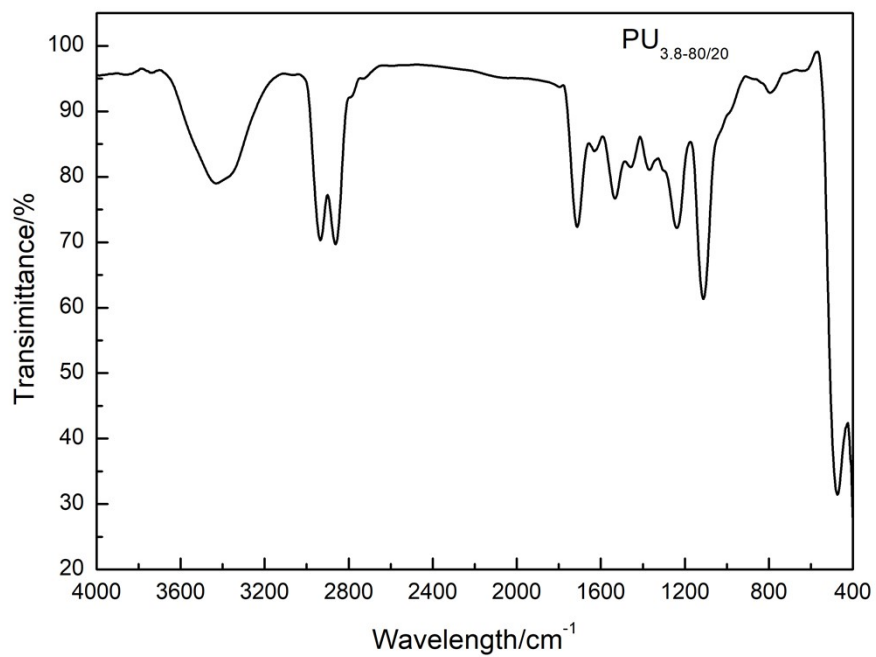

Figure S1. FTIR spectrum of PU<sub>3.8-80/20</sub>.

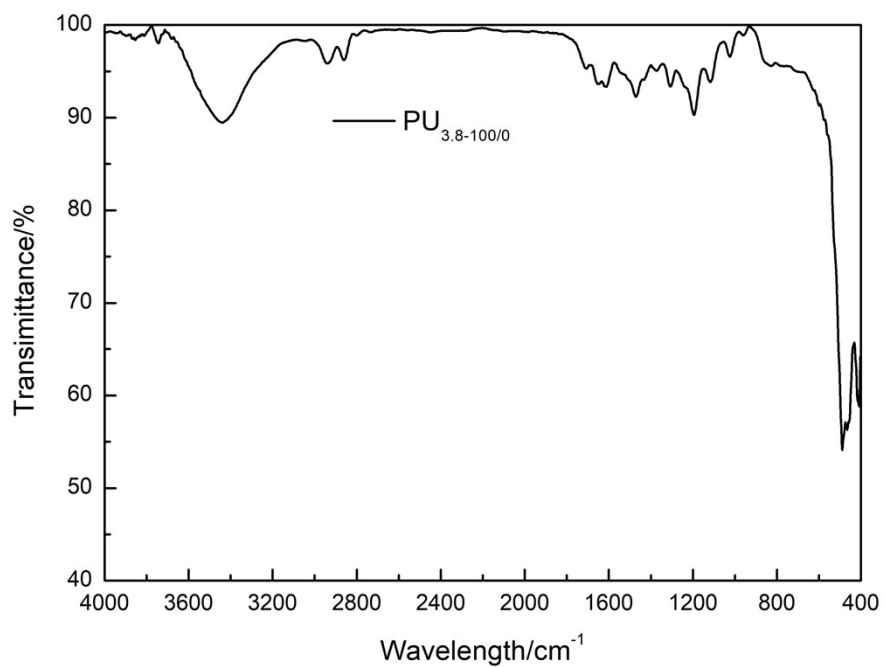

Figure S2. FTIR spectrum of PU<sub>3.8-100/0</sub>.

**Table S1.** FT-IR characteristic peak assignments of PU<sub>3.8-80/20</sub>.

| Assignments                                 | Wavenumber(cm <sup>-1</sup> ) |
|---------------------------------------------|-------------------------------|
| H-bonded $\nu$ (N-H)                        | 3428.9                        |
| va (CH <sub>2</sub> )                       | 2935                          |
| vs (CH <sub>2</sub> )                       | 2854                          |
| H-bonded $\nu$ (C=O) amide                  | 1712                          |
| H-bonded $\nu$ (C-N) + $\delta$ (N-H) amide | 1531                          |
| H-bonded $\nu$ (C-N) + $\delta$ (N-H) amide | 1234                          |
| $\nu$ (C-O-C)                               | 1114                          |
| $\delta$ (-C <sub>7</sub> H <sub>5</sub> -) | 794                           |

**Table S2.** FT-IR characteristic peak assignments of PU<sub>3.8-100/0</sub>.

| Assignments                                 | Wavenumber(cm <sup>-1</sup> ) |
|---------------------------------------------|-------------------------------|
| H-bonded $\nu$ (N-H)                        | 3442                          |
| va (CH <sub>2</sub> )                       | 2946                          |
| vs (CH <sub>2</sub> )                       | 2869                          |
| H-bonded $\nu$ (C=O) amide                  | 1716                          |
| H-bonded $\nu$ (C-N) + $\delta$ (N-H) amide | 1481                          |
| H-bonded $\nu$ (C-N) + $\delta$ (N-H) amide | 1201                          |
| $\nu$ (C-O-C)                               | 1116                          |

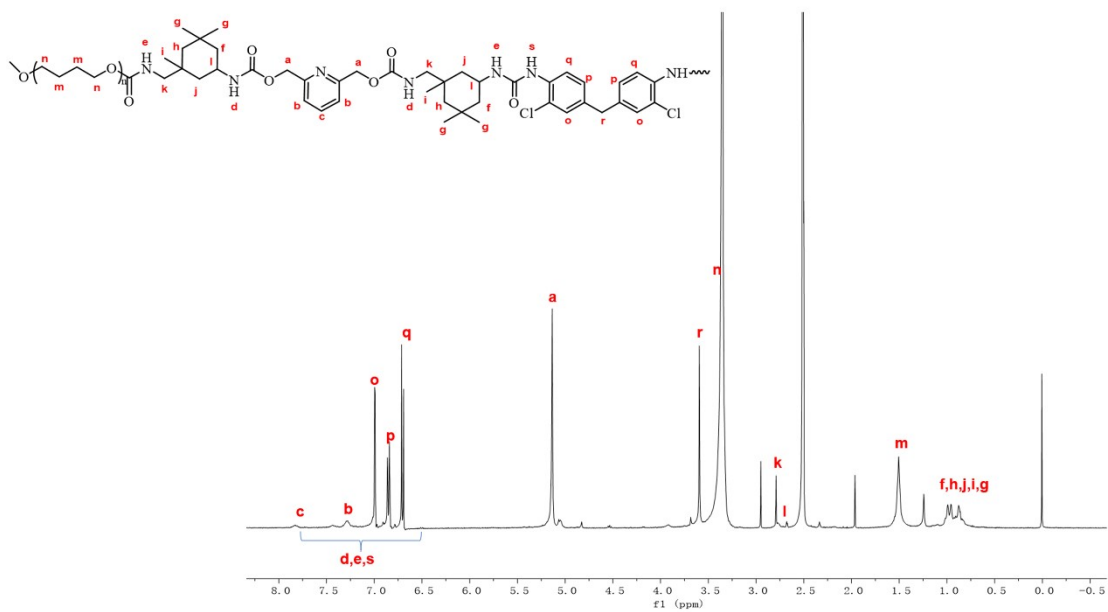

Figure S3. <sup>1</sup>H NMR spectrum of PU<sub>3.8-80/20</sub>.

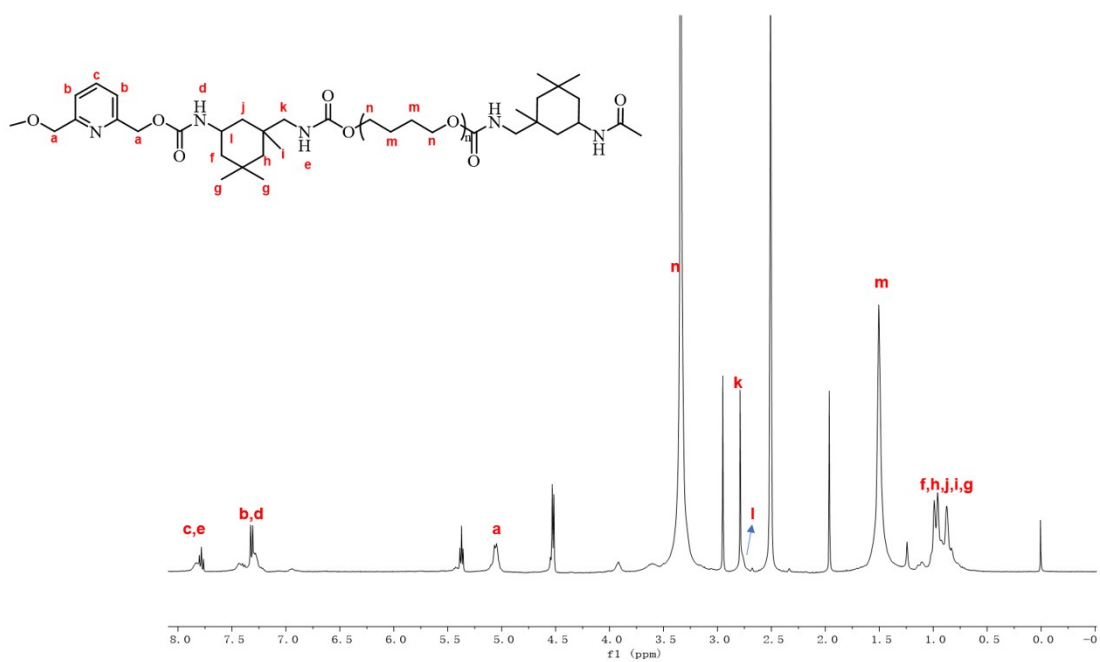

Figure S4. <sup>1</sup>H NMR spectrum of PU<sub>3.8-100/0</sub>.

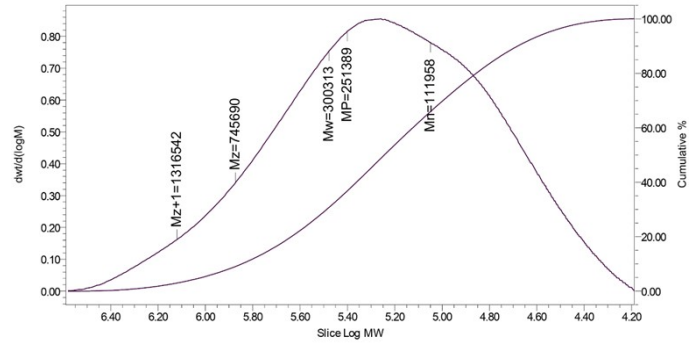

(a)

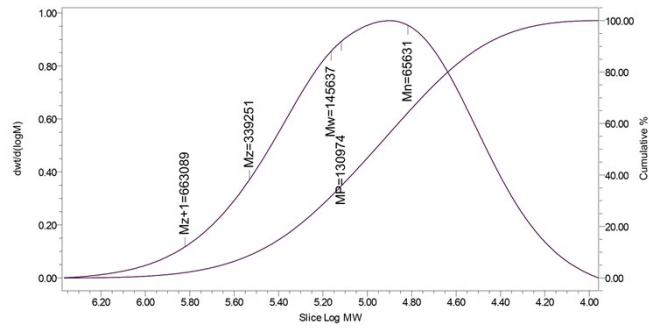

(b)

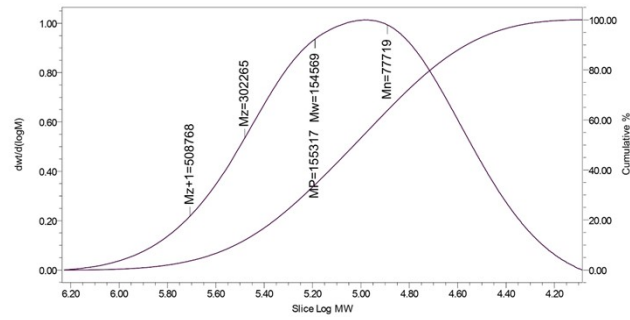

(c)

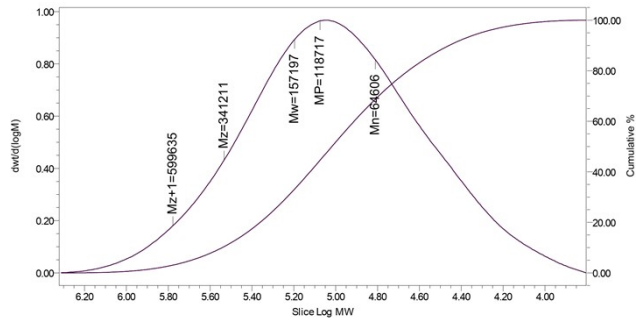

(d)

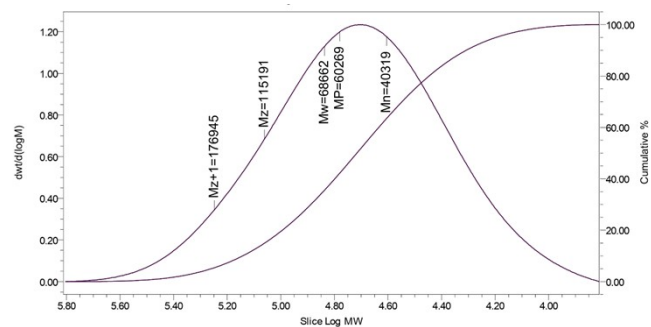

(e)

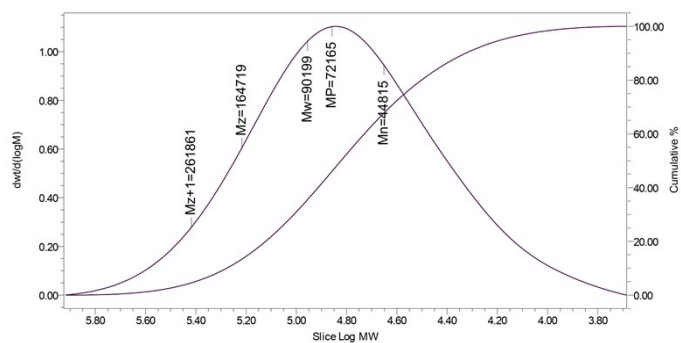

(f)

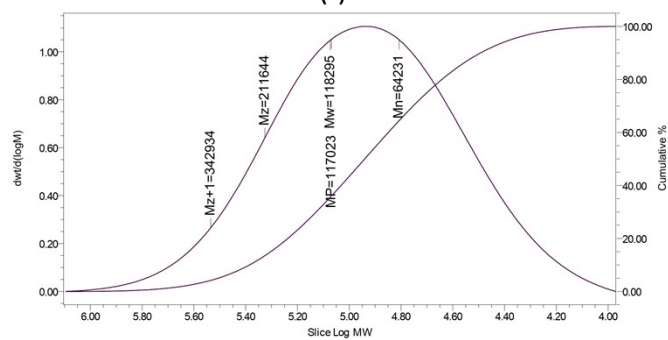

(g)

**Figure S5.** THF-GPC profiles of PU elastomers. (a) THF-GPC profiles of PU<sub>3.0-80/20</sub>. (b) THF-GPC profiles of PU<sub>3.5-80/20</sub>. (c) THF-GPC profiles of PU<sub>3.8-80/200</sub>. (a) THF-GPC profiles of PU<sub>4.0-80/20</sub>. (a) THF-GPC profiles of PU<sub>3.8-100/0</sub>. (a) THF-GPC profiles of PU<sub>3.8-90/10</sub>. (a) THF-GPC profiles of PU<sub>3.8-70/30</sub>.

**Table S3.** The GPC results of PU elastomer.

| Sample                  | $M_n$ (g/mol) | $M_w$ (g/mol) | PDI   |
|-------------------------|---------------|---------------|-------|
| PU <sub>3.0-80/20</sub> | 111958        | 300313        | 2.483 |
| PU <sub>3.5-80/20</sub> | 65631         | 145637        | 2.329 |
| PU <sub>3.8-80/20</sub> | 77719         | 154569        | 1.955 |
| PU <sub>4.0-80/20</sub> | 64606         | 157197        | 2.171 |
| PU <sub>3.8-100/0</sub> | 40319         | 68662         | 1.677 |
| PU <sub>3.8-90/10</sub> | 44815         | 90199         | 1.826 |
| PU <sub>3.8-70/30</sub> | 64231         | 118295        | 1.789 |

**Table S4.** Comparison of mechanical properties and self-healing efficiencies between PU<sub>3.8-80/20</sub> and recently reported room-temperature self-healing materials.

| Sample source | Tensile strength / MPa | Strain at break / % | Toughness / MJ.m <sup>-3</sup> | Self-healing efficiency /% | Fracture energy / kJ.m <sup>-2</sup> |
|---------------|------------------------|---------------------|--------------------------------|----------------------------|--------------------------------------|
| This work     | 34.1                   | 2014                | 127.3                          | 83%                        | 119.1                                |
| Ref. 5        | 1.1                    | 229                 | 6.5                            | 92.9%                      | ---                                  |
| Ref. 7        | 16.08                  | 771                 | 75.6                           | 94%                        | ---                                  |
| Ref. 8        | 5.72                   | 1726                | 24.45                          | 61.9%                      | ---                                  |
| Ref. 13       | 0.5                    | 1000                | ---                            | 95                         | ---                                  |
| Ref. 15       | 19.47                  | 1144.3              | 105.2                          | 75%                        | 41.8                                 |
| Ref. 16       | 4.83                   | 2010                | 65.49                          | 98%                        | 42.65                                |
| Ref. 17       | 27.4                   | 770                 | 110                            | 96                         | ---                                  |
| Ref. 18       | 1.3                    | 2100                | ---                            | 97                         | ---                                  |
| Ref. 25       | 6.31                   | 710                 | ---                            | 91.6                       | ---                                  |
| Ref. 26       | 3.9                    | 348.57              | ---                            | 76                         | ---                                  |
| Ref. 28       | 11.91                  | 723.57              | 30.07                          | 50                         | ---                                  |
| Ref. 29       | 11                     | 725.5               | 52.1                           | 83                         | ---                                  |
| Ref. 30       | 4.2                    | 954                 | ---                            | 90                         | ---                                  |
| Ref. 31       | 29                     | 1800                | 121.8                          | 80%                        | 104.1                                |
| Ref. 38       | 30                     | 700                 | ---                            | 82.27                      | ---                                  |
| Ref. 39       | 11.71                  | 295                 | ---                            | 52.6                       | ---                                  |
| Ref. 40       | 19.5                   | 675                 | ---                            | 83                         | ---                                  |
| Ref. 41       | 3.85                   | 3000                | 84.02                          | 70                         | ---                                  |
| Ref. 42       | 6.8                    | 920                 | 26.9                           | 75                         | ---                                  |
| Ref. 43       | 16.1                   | 771                 | ---                            | 94                         | ---                                  |
| Ref. 44       | 12.7                   | 182                 | ---                            | 87.3                       | ---                                  |



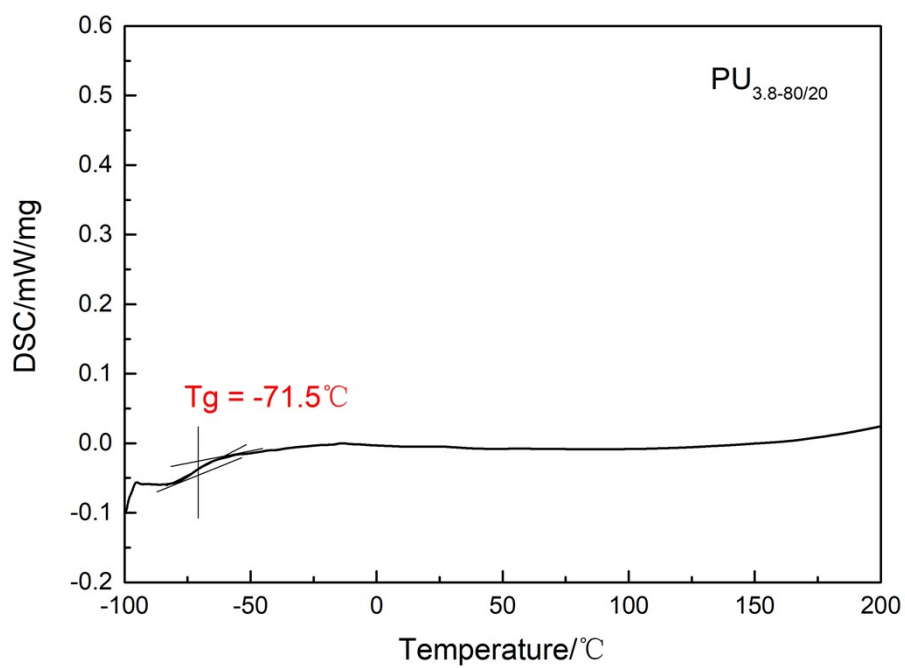

**Figure S6.** DSC curve of PU<sub>3.8-80/20</sub>.

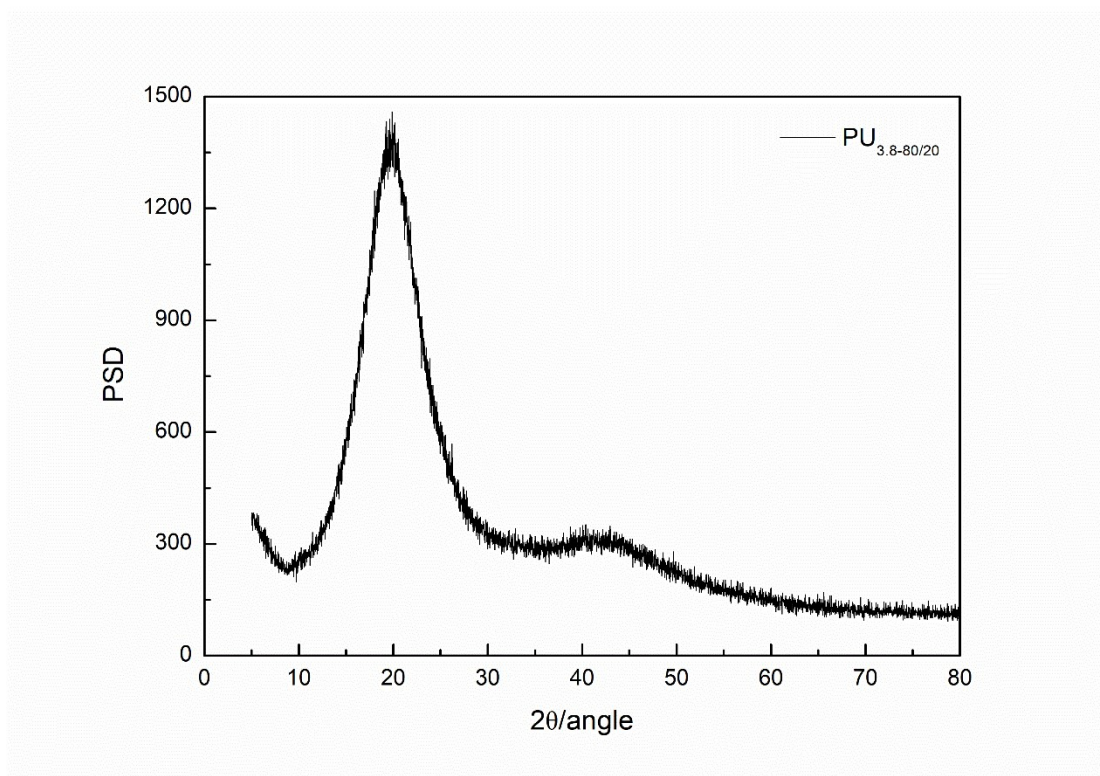

**Figure S7.** WXAD curve of PU<sub>3.8-80/20</sub>, the XRD curve only displayed broad diffraction peaks, indicating the amorphous state at room temperature.

**Table S5.** The original mechanical performances of PU elastomers.

| Sample                  | Tensile strength/MPa | Elongation/% | Toughness/MJ·m <sup>-3</sup> |
|-------------------------|----------------------|--------------|------------------------------|
| PU <sub>3.0-80/20</sub> | 8.4                  | 1855         | 47.7                         |
| PU <sub>3.5-80/20</sub> | 21.6                 | 2309         | 81.4                         |
| PU <sub>3.8-80/20</sub> | 34.1                 | 2014         | 127.3                        |
| PU <sub>4.0-80/20</sub> | 22.2                 | 2481         | 120.8                        |
| PU <sub>3.8-100/0</sub> | 0.6                  | 2960         | 15.5                         |
| PU <sub>3.8-90/10</sub> | 2.0                  | 3003         | 27.6                         |
| PU <sub>3.8-70/30</sub> | 27.5                 | 1806         | 94.0                         |

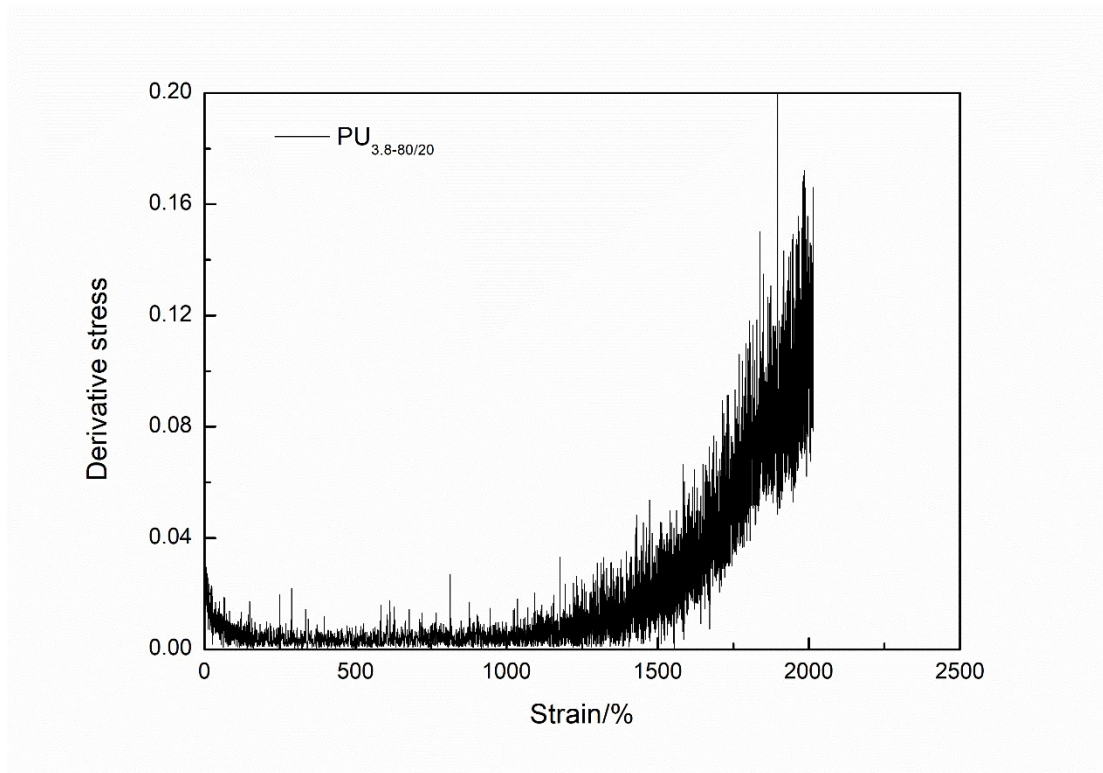

**Figure S8.** Derivative stress versus strain curve of PU<sub>3.8-80/20</sub> for illustrating the changing rate of tensile strength.

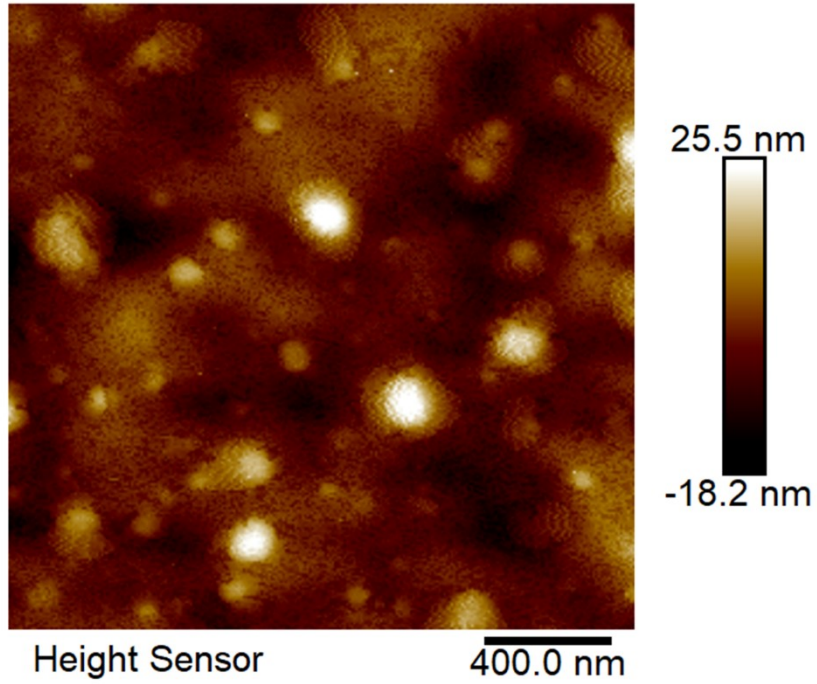

(a)

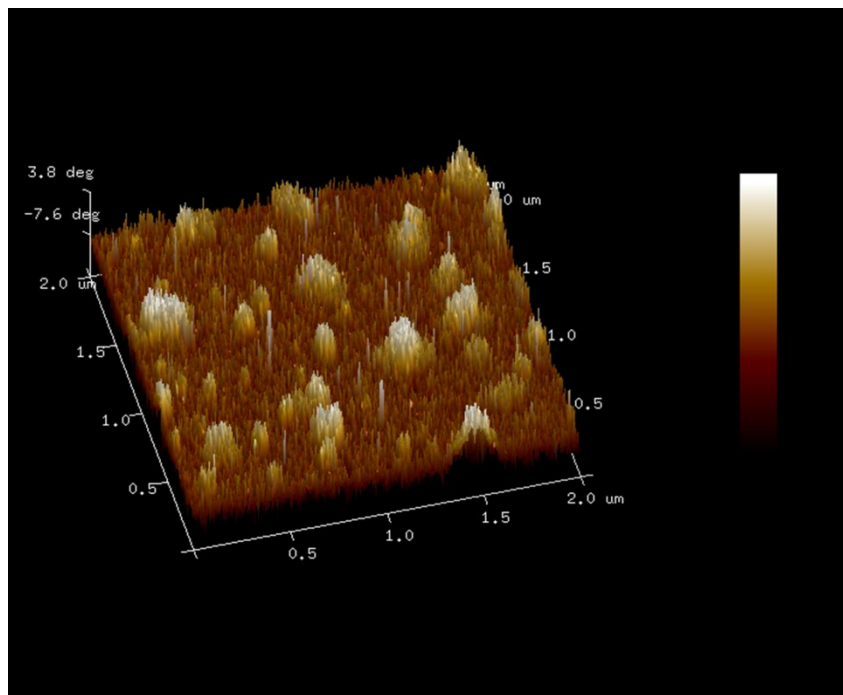

(b)

**Figure S9.** AFM images of  $\text{PU}_{3.8-80/20}$ . (a) AFM height sensor image of  $\text{PU}_{3.8-80/20}$ . (b) AFM 3D phase image of  $\text{PU}_{3.8-80/20}$ .

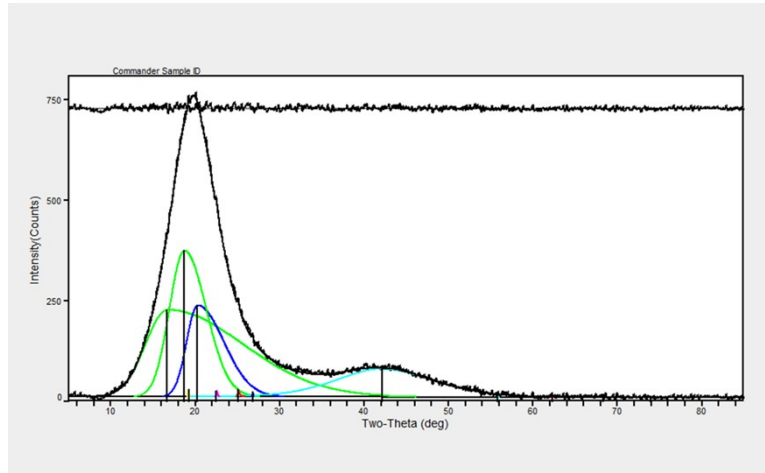

(a)

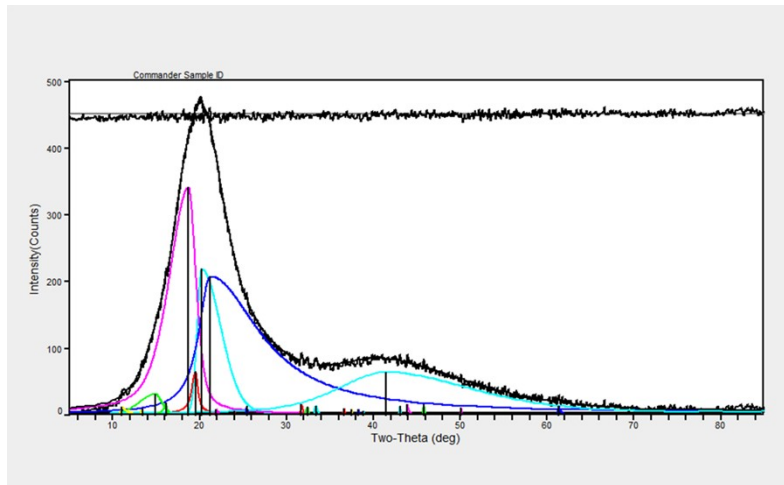

(b)

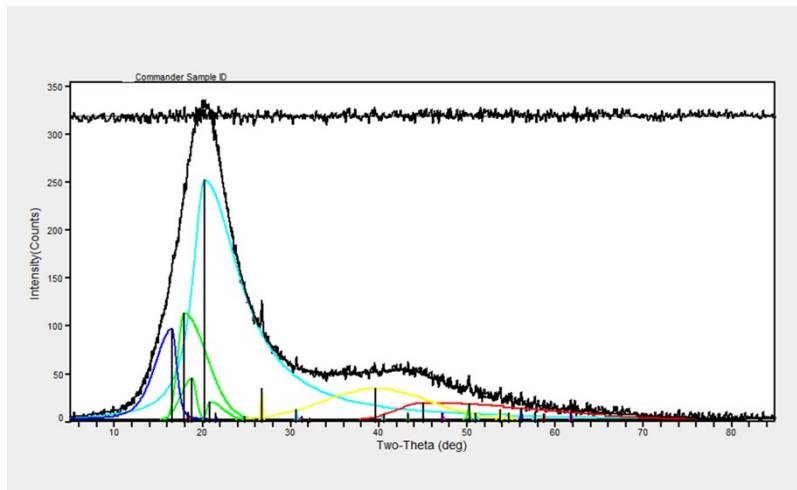

(c)

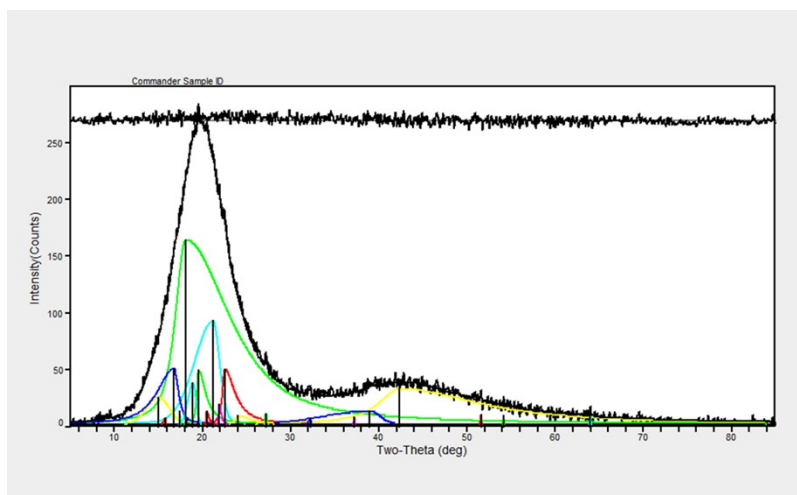

(d)

**Figure S10.** Fitting calculation (MDI Jade 6 software) of the crystallinity of elastomer PU<sub>3.8-80/20</sub> in different strain state. (a) Fitting calculation (MDI Jade 6 software) of the crystallinity of elastomer PU<sub>3.8-80/20</sub> in strain state 0%. (b) Fitting calculation (MDI Jade 6 software) of the crystallinity of elastomer PU<sub>3.8-80/20</sub> in strain state 500%. (c) Fitting calculation (MDI Jade 6 software) of the crystallinity of elastomer PU<sub>3.8-80/20</sub> in strain state 1000%. (d) Fitting calculation (MDI Jade 6 software) of the crystallinity of elastomer PU<sub>3.8-80/20</sub> in strain state 1500%.

**Table S6.** The room-temperature self-healing result of PU elastomer at 25 °C for 48h.

| Sample                  | Tensile strength (SE)/% | Elongation (SE)/% | Toughness (SE)/% |
|-------------------------|-------------------------|-------------------|------------------|
| PU <sub>3.0-80/20</sub> | 94.7                    | 91.3              | 94.6             |
| PU <sub>3.5-80/20</sub> | 88.2                    | 108.8             | 98.2             |
| PU <sub>3.8-80/20</sub> | 83.3                    | 100.1             | 88.4             |
| PU <sub>4.0-80/20</sub> | 76.4                    | 101.1             | 82.0             |
| PU <sub>3.8-100/0</sub> | 98.7                    | 101.2             | 99.2             |
| PU <sub>3.8-90/10</sub> | 97.0                    | 93.1              | 96.2             |
| PU <sub>3.8-70/30</sub> | 82.8                    | 99.3              | 90.7             |



**Table S7.** The mechanical performances of PU<sub>3.8-80/20</sub> with self-healing time from 12h to 48h.

| PU <sub>3.8-80/20</sub> | Tensile strength (SE)/% | Elongation (SE)/% | Toughness (SE)/% |
|-------------------------|-------------------------|-------------------|------------------|
| 12h                     | 43.6                    | 78.8              | 45.9             |
| 24h                     | 68.1                    | 90.4              | 66.7             |
| 36h                     | 77.1                    | 94.3              | 80.1             |
| 48h                     | 83.3                    | 100.1             | 88.4             |

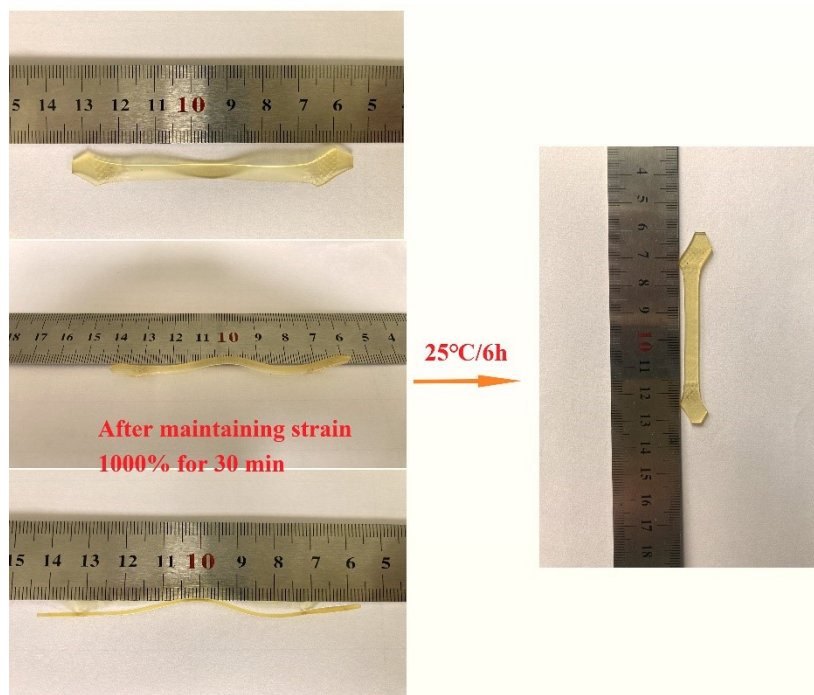

**Figure S11.** Optical images for after stretching and recovery of PU<sub>3.8-80/20</sub> film.

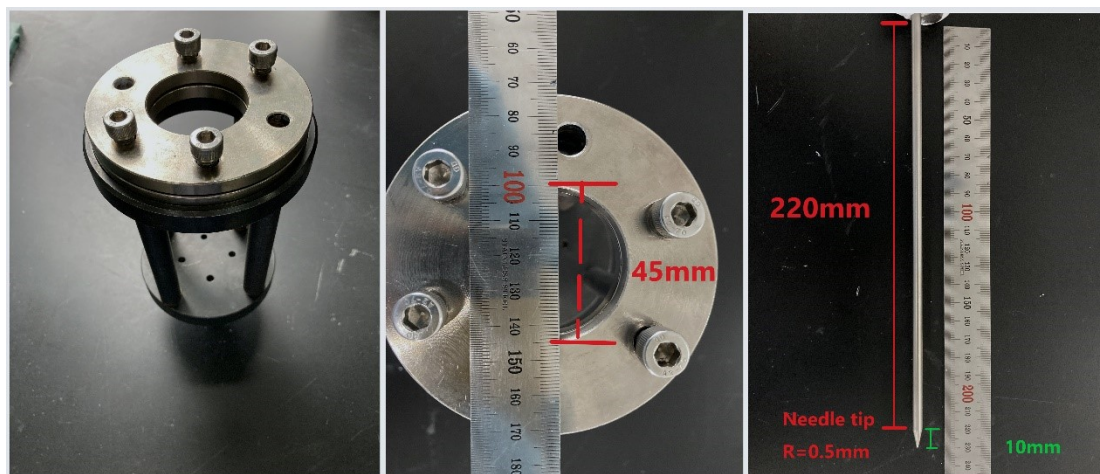

**Figure S12.** The dimension of steel needle and fixture in puncture test.

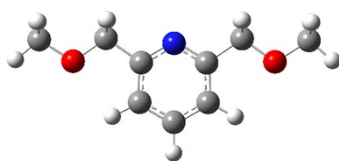

(a)

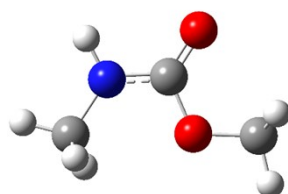

(b)

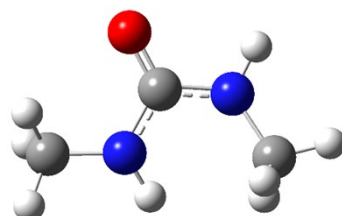

(c)

**Figure S13.** Optimized molecular structure for simulation. (a) Monomer A. (b) Monomer B. (c) Monomer C.

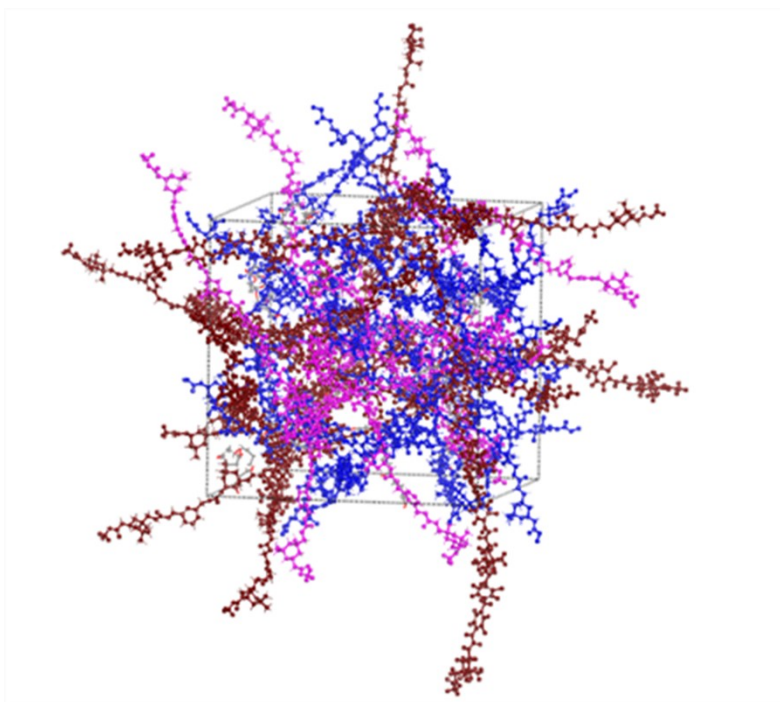

(a)

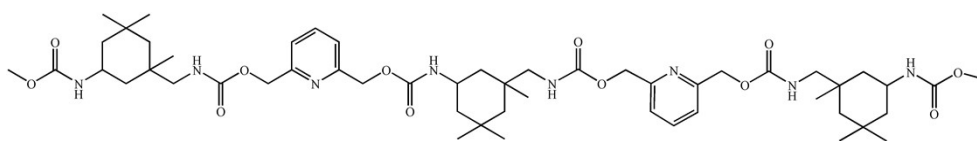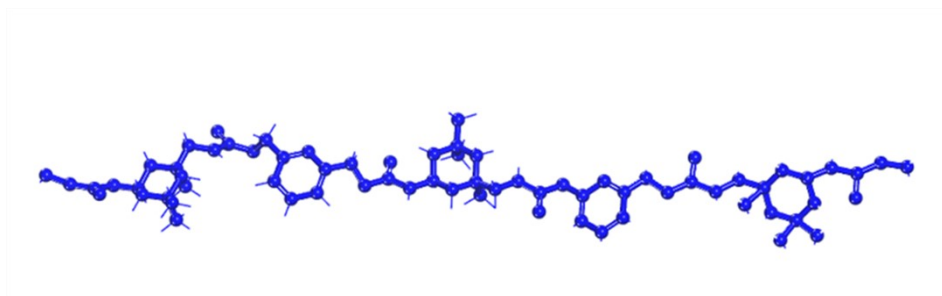

(b)

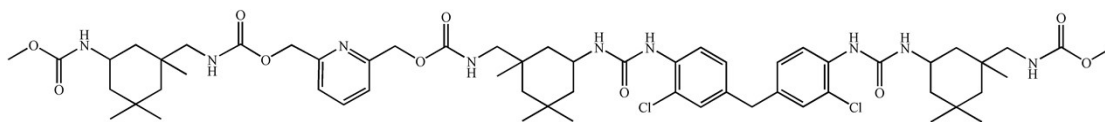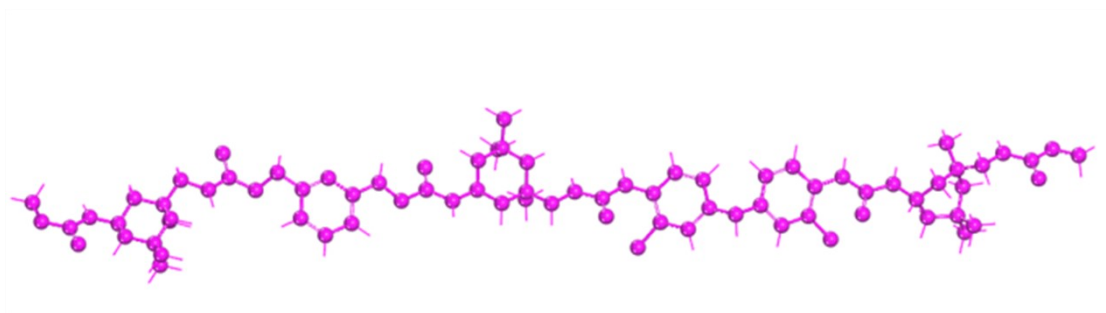

(c)

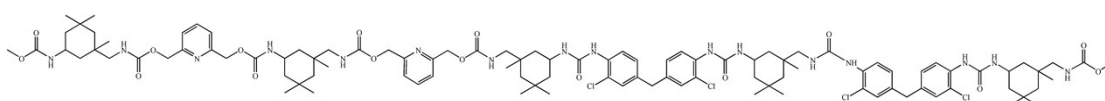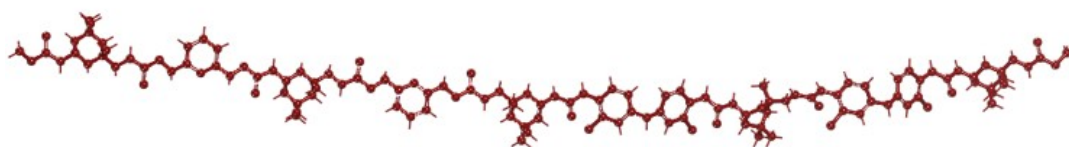

(d)

**Figure S14.** Schematic representation of a simulated molecular cell of PU<sub>3.8-80/20</sub> in the equilibrium state. (a) hard domains are emphasized on the ball-and-stick models. (b) Quantum chemical simulation of hard domains. Optimized hard segments a for simulations. (c) Quantum chemical simulation of hard domains. Optimized hard segments b for simulations. (d) Quantum chemical simulation of hard domains. Optimized hard segments c for simulations.

### **Quantum chemistry calculation**

All calculations in this work were performed using Gaussian 09 program package<sup>1</sup>. Full geometry optimizations were performed to locate all the stationary points, using B3LYP-D3<sup>2</sup>/6-311+G (d, p)<sup>3-4</sup>. Single point energies were also obtained for all optimized structures using dispersion-corrected density functional (DFT-D3(BJ)) with the 6-311+G (d, p) basis set. Quantum theory of atoms-in-molecules (QTAIM) descriptors and other H-Bondings were calculated based on high-quality density functional theory wave functions using the Multiwfn software<sup>5</sup>. The monomer structures A, B, C were illustrated in Figure S13.

### **Molecular simulation method**

Molecular dynamic simulations were performed to study the polymer behavior. Our simulation calculation was conducted on four structures with an integration time-step of 1 fs. Periodic boundary conditions were applied in the *x*- and *y*-dimensions. The box size of the samples was 50 × 50 × 50 nm<sup>3</sup> (Figure S14 a). First, the conjugate gradient algorithm and energy minimization were performed to obtain a stable structure. Condensed-phased Optimized Molecular Potential for Atomistic Simulation Studies force field was also used to optimize these structures. Each sample was then equilibrated under the NPT ensemble at a constant temperature of 300 K to achieve an equilibrium state with zero pressure for 30 ns. The equilibration molecular systems of the pure separation membrane could be obtained after geometrically optimizing. The system is composed of 30 a, 10 b, 10 c (Figures S14 b, c, d), and 10 soft segments. Furthermore, a potential cutoff radius of 2.25 nm is applied in the calculation of the non-bonded interaction. And the PPPM has been used to describe the electrostatic. The Andersen feedback thermostat and Berendsen barostat algorithm are applied in the system with temperature and pressure conversion. Finally, the properties of our structures are obtained in the last 3000 ps. The binding energy can be used to measure the intensity of the interaction between a, b and c.

## Reference

1. M.J. Frisch, G.W. Trucks, H.B. Schlegel, G.E. Scuseria, M.A. Robb, J.R. Cheeseman, G. Scalmani, V. Barone, B. Mennucci, G.A. Petersson, H. Nakatsuji, M. Caricato, X. Li, H.P. Hratchian, A.F. Izmaylov, J. Bloino, G. Zheng, J.L. Sonnenberg, M. Hada, M. Ehara, K. Toyota, R. Fukuda, J. Hasegawa, M. Ishida, T. Nakajima, Y. Honda, O. Kitao, H. Nakai, T. Vreven, J.A. Montgomery, J.J.E. Peralta, F. Ogliaro, M. Bearpark, J.J. Heyd, E. Brothers, K.N. Kudin, V.N. Taroverov, T. Keith, R. Kobayashi, J. Normand, K. Raghavachari, A. Rendell, J.C. Burant, S.S. Iyengar, J. Tomasi, M. Cossi, N. Rega, J.M. Millam, M. Klene, J.E. Knox, J.B. Cross, V. Bakken, C. Adamo, J. Jaramillo, R. Gomperts, R.E. Stratmann, O. Yazyev, A. J. Austin, R. Cammi, C. Pomelli, J. W. Ochterski, R.L. Martin, K. Morokuma, V.G. Zakrzewski, G.A. Voth, P. Salvador, J.J. Dannenberg, S. Dapprich, A.D. Daniels, O. Farkas, J.B. Foresman, J.V. Ortiz, J. Cioslowski, D.J. Fox, Gaussian 09 (Revision D.01), I. Gaussian, Wallingford, CT, **2013**.
2. Grimme, S.; Antony, J.; Ehrlich, S.; Krieg, H., A consistent and accurate ab initio parametrization of density functional dispersion correction (DFT-D) for the 94 elements H-Pu. *J. Chem. Phys.* **2010**, *132* (15), 154104.
3. Xu S., He T., Li J., Huang Z., & Hu C., Enantioselective synthesis of D-lactic acid via chemocatalysis using MgO: Experimental and molecular-based rationalization of the triose's reactivity and preliminary insights with raw biomass. *Appl. Catal. B: Environ.* **2021**, 292:120145.
4. McLean, A. D.; Chandler, G. S. Contracted Gaussian basis sets for molecular calculations. I. Second row atoms,  $Z = 11-18$ . *J. Chem. Phys.* **1980**, *72*, 5639-5648.
- 5 Lu, T.; Chen, F., Multiwfn: a multifunctional wavefunction analyzer. *J. Comput. Chem.* **2012**, *33* (5), 580-92.
